# Supplementary material for: Symptomatic Intracranial Hemorrhage After Endovascular Stroke Treatment: External Validation of Prediction Models
Source: PubMed Central journal article supplement (PMC9855739; doi:10.1161/strokeaha.122.040065), 2023-01-24
Supplement: str-54-476-s001.pdf [file str-54-476-s001.pdf]

## **SUPPLEMENTAL MATERIAL**

**Symptomatic intracranial hemorrhage after endovascular stroke treatment: External validation of prediction models**

**Table S1.** Search strategy to identify published models to predict symptomatic intracranial hemorrhage.

| Database     | Search algorithm                                                                                                                                                                                                                                                                                                                                                                                                                                                                                                                                                                                                                                                                                                                                                                                                                                                                                                                                                                                                                                                                                                                                                                                                                                                                                                                                                                                                                                                                                                                                                                                                                                                                                                                                                                  |
|--------------|-----------------------------------------------------------------------------------------------------------------------------------------------------------------------------------------------------------------------------------------------------------------------------------------------------------------------------------------------------------------------------------------------------------------------------------------------------------------------------------------------------------------------------------------------------------------------------------------------------------------------------------------------------------------------------------------------------------------------------------------------------------------------------------------------------------------------------------------------------------------------------------------------------------------------------------------------------------------------------------------------------------------------------------------------------------------------------------------------------------------------------------------------------------------------------------------------------------------------------------------------------------------------------------------------------------------------------------------------------------------------------------------------------------------------------------------------------------------------------------------------------------------------------------------------------------------------------------------------------------------------------------------------------------------------------------------------------------------------------------------------------------------------------------|
| Embase.com   | ('brain hemorrhage'/exp OR bleeding/de OR 'postoperative hemorrhage'/de OR (hemorrhag* OR haemorrhag* OR microhemorrhag* OR microhaemorrhag* OR bleeding OR lesion*):ab,ti) AND ('thrombectomy'/exp OR 'endovascular surgery'/de OR 'embolectomy'/exp OR 'thrombectomy device'/exp OR 'embolectomy system'/de OR 'blood clot lysis'/exp OR 'fibrinolytic therapy'/exp OR 'fibrinolytic agent'/exp OR 'cerebral revascularization'/de OR 'intraarterial drug administration'/de OR (EVT OR embolect* OR thrombect* OR Soehendra OR Solitaire OR Trevo OR Penumbra OR AngioJet OR APERIO OR ASPIRE OR BONnet OR ((CRC OR pREset OR Revive OR Catch) NEAR/3 (device* OR LITE)) OR ERIC OR FlowTrieve OR MindFrame-Capture OR Rotarex OR MERCI OR Phenox-Clot OR ((stent*) NEAR/3 (retriever*)) OR ((thrombus* OR thrombi* OR embol*) NEAR/3 (aspirat* OR excision* OR remov*)) OR ((thrombolys* OR therap* OR treatment* OR procedure*) NEAR/6 (intra-arterial*)) OR endovascular* OR endo-vascular* OR intra-arter* OR intraarter* OR (clot NEAR/3 (lysis OR removal)) OR thromboly* OR postthromboly* OR fibrinoly* OR (plasminogen* NEAR/3 activat*) OR revascular*):ab,ti) AND ('prediction and forecasting'/exp OR 'prognostic assessment'/exp OR 'prognosis'/de OR (predict* OR forecast* OR prognos*):ab,ti) AND ('brain infarction'/exp OR 'cerebrovascular accident'/exp OR (CVA OR stroke* OR ((cerebr* OR brain* OR cerebellum* OR migrain* OR cortical* OR hemispher*) NEAR/3 (infarct*)) OR ((cerebr* OR brain* OR cerebellum*) NEAR/3 (accident* OR lesion* OR vasculopath* OR insult* OR attack* OR disturbance* OR apoplexy* OR apoplec* OR insuffic* OR arrest* OR failure* OR injur*)):ab,ti) NOT ([animals]/lim NOT [humans]/lim) NOT ([Conference Abstract]/lim) |
| Medline Ovid | (exp Intracranial Hemorrhages/ OR Hemorrhage/ OR Postoperative Hemorrhage/ OR (hemorrhag* OR haemorrhag* OR microhemorrhag* OR microhaemorrhag* OR bleeding OR lesion*).ab,ti.) AND (exp Thrombectomy/ OR Endovascular Procedures/ OR exp Embolectomy/ OR blood clot lysis/ OR exp Thrombolytic Therapy/ OR exp Fibrinolytic Agents/ OR Cerebral Revascularization/ OR intraarterial drug administration/ OR (EVT OR embolect* OR thrombect* OR Soehendra OR Solitaire OR Trevo OR Penumbra OR AngioJet OR APERIO OR ASPIRE OR BONnet OR ((CRC OR pREset OR Revive OR Catch) ADJ3 (device* OR LITE)) OR ERIC OR FlowTrieve OR MindFrame-Capture OR Rotarex OR MERCI OR Phenox-Clot OR ((stent*) ADJ3 (retriever*)) OR ((thrombus* OR thrombi* OR embol*) ADJ3 (aspirat* OR excision* OR remov*)) OR ((thrombolys* OR therap* OR treatment* OR procedure*) ADJ6 (intra-arterial*)) OR                                                                                                                                                                                                                                                                                                                                                                                                                                                                                                                                                                                                                                                                                                                                                                                                                                                                                              |

|                         |                                                                                                                                                                                                                                                                                                                                                                                                                                                                                                                                                                                                                                                                                                                                                                                                                                                                                                                                                                                                                                                                                                                                                                                                                   |
|-------------------------|-------------------------------------------------------------------------------------------------------------------------------------------------------------------------------------------------------------------------------------------------------------------------------------------------------------------------------------------------------------------------------------------------------------------------------------------------------------------------------------------------------------------------------------------------------------------------------------------------------------------------------------------------------------------------------------------------------------------------------------------------------------------------------------------------------------------------------------------------------------------------------------------------------------------------------------------------------------------------------------------------------------------------------------------------------------------------------------------------------------------------------------------------------------------------------------------------------------------|
|                         | <p>endovascular* OR endo-vascular* OR intra-arter* OR intraarter* OR (clot ADJ3 (lysis OR removal)) OR thromboly* OR postthromboly* OR fibrinoly* OR (plasminogen* ADJ3 activat*) OR revascular*).ab,ti.) AND (exp Forecasting/ OR Prognosis/ OR (predict* OR forecast* OR prognos*).ab,ti.) AND (exp Brain Infarction/ OR exp Stroke/ OR (CVA OR stroke* OR ((cerebr* OR brain* OR cerebellum* OR migrain* OR cortical* OR hemispher*) ADJ3 (infarct*)) OR ((cerebr* OR brain* OR cerebellum*) ADJ3 (accident* OR lesion* OR vasculopath* OR insult* OR attack* OR disturbance* OR apoplexy* OR apoplec* OR insuffic* OR arrest* OR failure* OR injur*))),ab,ti.) NOT (exp animals/ NOT humans/) NOT (news OR congres* OR abstract* OR book* OR chapter* OR dissertation abstract*).pt.</p>                                                                                                                                                                                                                                                                                                                                                                                                                      |
| <p>Cochrane central</p> | <p>((hemorrhag* OR haemorrhag* OR microhemorrhag* OR microhaemorrhag* OR bleeding OR lesion*):ab,ti) AND ((EVT OR embolect* OR thrombect* OR Soehendra OR Solitaire OR Trevo OR Penumbra OR AngioJet OR APERIO OR ASPIRE OR BONnet OR ((CRC OR pREset OR Revive OR Catch) NEAR/3 (device* OR LITE)) OR ERIC OR FlowTrieve OR MindFrame next Capture OR Rotarex OR MERCI OR Phenox next Clot OR ((stent*) NEAR/3 (retriever*)) OR ((thrombus* OR thrombi* OR embol*) NEAR/3 (aspirat* OR excision* OR remov*)) OR ((thrombolys* OR therap* OR treatment* OR procedure*) NEAR/6 (intra next arterial*)) OR endovascular* OR endo next vascular* OR intra next arter* OR intraarter* OR (clot NEAR/3 (lysis OR removal)) OR thromboly* OR postthromboly* OR fibrinoly* OR (plasminogen* NEAR/3 activat*) OR revascular*):ab,ti) AND ((predict* OR forecast* OR prognos*):ab,ti) AND ((CVA OR stroke* OR ((cerebr* OR brain* OR cerebellum* OR migrain* OR cortical* OR hemispher*) NEAR/3 (infarct*)) OR ((cerebr* OR brain* OR cerebellum*) NEAR/3 (accident* OR lesion* OR vasculopath* OR insult* OR attack* OR disturbance* OR apoplexy* OR apoplec* OR insuffic* OR arrest* OR failure* OR injur*))),ab,ti)</p> |
| <p>Web of science</p>   | <p>TS=(((hemorrhag* OR haemorrhag* OR microhemorrhag* OR microhaemorrhag* OR bleeding OR lesion*)) AND ((EVT OR embolect* OR thrombect* OR Soehendra OR Solitaire OR Trevo OR Penumbra OR AngioJet OR APERIO OR ASPIRE OR BONnet OR ((CRC OR pREset OR Revive OR Catch) NEAR/2 (device* OR LITE)) OR ERIC OR FlowTrieve OR MindFrame-Capture OR Rotarex OR MERCI OR Phenox-Clot OR ((stent*) NEAR/2 (retriever*)) OR ((thrombus* OR thrombi* OR embol*) NEAR/2 (aspirat* OR excision* OR remov*)) OR ((thrombolys* OR therap* OR treatment* OR procedure*) NEAR/5 (intra-arterial*)) OR endovascular* OR endo-vascular* OR intra-arter* OR intraarter* OR (clot NEAR/2 (lysis OR removal)) OR thromboly* OR postthromboly* OR fibrinoly* OR (plasminogen* NEAR/2 activat*) OR revascular*)) AND ((predict* OR forecast* OR prognos*)) AND ((CVA OR stroke* OR ((cerebr* OR brain* OR</p>                                                                                                                                                                                                                                                                                                                          |

|  |                                                                                                                                                                                                                                                                                                                                    |
|--|------------------------------------------------------------------------------------------------------------------------------------------------------------------------------------------------------------------------------------------------------------------------------------------------------------------------------------|
|  | <p>cerebellum* OR migrain* OR cortical* OR hemispher*) NEAR/2 (infarct*)<br/>OR ((cerebr* OR brain* OR cerebellum*) NEAR/2 (accident* OR lesion* OR<br/>vasculopath* OR insult* OR attack* OR disturbance* OR apoplexy* OR<br/>apolec* OR insuffic* OR arrest* OR failure* OR injur*)))) AND<br/>DT=(article) AND LA=(english)</p> |
|--|------------------------------------------------------------------------------------------------------------------------------------------------------------------------------------------------------------------------------------------------------------------------------------------------------------------------------------|

**Table S2. STROBE Statement—Checklist of items that should be included in reports of *cohort studies*.**

|                              | <b>Item No</b> | <b>Recommendation</b>                                                                                                                                                                | <b>Addressed on page number</b> |
|------------------------------|----------------|--------------------------------------------------------------------------------------------------------------------------------------------------------------------------------------|---------------------------------|
| <b>Title and abstract</b>    | 1              | (a) Indicate the study's design with a commonly used term in the title or the abstract                                                                                               | 1                               |
|                              |                | (b) Provide in the abstract an informative and balanced summary of what was done and what was found                                                                                  | 3                               |
| <b>Introduction</b>          |                |                                                                                                                                                                                      |                                 |
| Background/rationale         | 2              | Explain the scientific background and rationale for the investigation being reported                                                                                                 | 4                               |
| Objectives                   | 3              | State specific objectives, including any prespecified hypotheses                                                                                                                     | 4                               |
| <b>Methods</b>               |                |                                                                                                                                                                                      |                                 |
| Study design                 | 4              | Present key elements of study design early in the paper                                                                                                                              | 5                               |
| Setting                      | 5              | Describe the setting, locations, and relevant dates, including periods of recruitment, exposure, follow-up, and data collection                                                      | 5                               |
| Participants                 | 6              | (a) Give the eligibility criteria, and the sources and methods of selection of participants. Describe methods of follow-up                                                           | 5                               |
|                              |                | (b) For matched studies, give matching criteria and number of exposed and unexposed                                                                                                  |                                 |
| Variables                    | 7              | Clearly define all outcomes, exposures, predictors, potential confounders, and effect modifiers. Give diagnostic criteria, if applicable                                             | 6                               |
| Data sources/<br>measurement | 8*             | For each variable of interest, give sources of data and details of methods of assessment (measurement). Describe comparability of assessment methods if there is more than one group | 5-6,<br>Supplemental Table IV   |
| Bias                         | 9              | Describe any efforts to address potential sources of bias                                                                                                                            | 6                               |
| Study size                   | 10             | Explain how the study size was arrived at                                                                                                                                            | 4                               |
| Quantitative variables       | 11             | Explain how quantitative variables were handled in the analyses. If applicable, describe which groupings were chosen and why                                                         | 6                               |

|                     |     |                                                                                                                                                                                                              |               |
|---------------------|-----|--------------------------------------------------------------------------------------------------------------------------------------------------------------------------------------------------------------|---------------|
| Statistical methods | 12  | (a) Describe all statistical methods, including those used to control for confounding                                                                                                                        | 6-7           |
|                     |     | (b) Describe any methods used to examine subgroups and interactions                                                                                                                                          | NA            |
|                     |     | (c) Explain how missing data were addressed                                                                                                                                                                  | 7             |
|                     |     | (d) If applicable, explain how loss to follow-up was addressed                                                                                                                                               | NA            |
|                     |     | (e) Describe any sensitivity analyses                                                                                                                                                                        | NA            |
| <b>Results</b>      |     |                                                                                                                                                                                                              |               |
| Participants        | 13* | (a) Report numbers of individuals at each stage of study—eg numbers potentially eligible, examined for eligibility, confirmed eligible, included in the study, completing follow-up, and analysed            | 8             |
|                     |     | (b) Give reasons for non-participation at each stage                                                                                                                                                         | NA            |
|                     |     | (c) Consider use of a flow diagram                                                                                                                                                                           | NA            |
| Descriptive data    | 14* | (a) Give characteristics of study participants (eg demographic, clinical, social) and information on exposures and potential confounders                                                                     | 8, Table 2    |
|                     |     | (b) Indicate number of participants with missing data for each variable of interest                                                                                                                          | Table 1 and 2 |
|                     |     | (c) Summarise follow-up time (eg, average and total amount)                                                                                                                                                  | NA            |
| Outcome data        | 15* | Report numbers of outcome events or summary measures over time                                                                                                                                               | 8             |
| Main results        | 16  | (a) Give unadjusted estimates and, if applicable, confounder-adjusted estimates and their precision (eg, 95% confidence interval). Make clear which confounders were adjusted for and why they were included | 8             |
|                     |     | (b) Report category boundaries when continuous variables were categorized                                                                                                                                    | 8             |
|                     |     | (c) If relevant, consider translating estimates of relative risk into absolute risk for a meaningful time period                                                                                             | NA            |
| Other analyses      | 17  | Report other analyses done—eg analyses of subgroups and interactions, and sensitivity analyses                                                                                                               | NA            |
| <b>Discussion</b>   |     |                                                                                                                                                                                                              |               |
| Key results         | 18  | Summarise key results with reference to study objectives                                                                                                                                                     | 8-10          |

|                          |    |                                                                                                                                                                            |      |
|--------------------------|----|----------------------------------------------------------------------------------------------------------------------------------------------------------------------------|------|
| Limitations              | 19 | Discuss limitations of the study, taking into account sources of potential bias or imprecision. Discuss both direction and magnitude of any potential bias                 | 10   |
| Interpretation           | 20 | Give a cautious overall interpretation of results considering objectives, limitations, multiplicity of analyses, results from similar studies, and other relevant evidence | 8-10 |
| Generalisability         | 21 | Discuss the generalisability (external validity) of the study results                                                                                                      | 8-10 |
| <b>Other information</b> |    |                                                                                                                                                                            |      |
| Funding                  | 22 | Give the source of funding and the role of the funders for the present study and, if applicable, for the original study on which the present article is based              | 11   |

\*Give information separately for exposed and unexposed groups.

**Note:** An Explanation and Elaboration article discusses each checklist item and gives methodological background and published examples of transparent reporting. The STROBE checklist is best used in conjunction with this article (freely available on the Web sites of PLoS Medicine at <http://www.plosmedicine.org/>, Annals of Internal Medicine at <http://www.annals.org/>, and Epidemiology at <http://www.epidem.com/>). Information on the STROBE Initiative is available at <http://www.strobe-statement.org>.

**Table S3.** Development characteristics of published models to predict symptomatic intracranial hemorrhage.

| <b>Model name</b>            | <b>Predicted outcome</b> | <b>sICH definition</b> | <b>Treatment in derivation cohort</b>                                 | <b>Number of patients with the outcome/number of total patients in derivation cohort</b>                                                        | <b>Regression model or risk score</b> | <b>Number of predictors in model</b> |
|------------------------------|--------------------------|------------------------|-----------------------------------------------------------------------|-------------------------------------------------------------------------------------------------------------------------------------------------|---------------------------------------|--------------------------------------|
| <b>ASIAN<sup>9</sup></b>     | sICH                     | According to the HBC   | Patients treated with EVT in the anterior circulation in China.       | 87/629 (13.8%)                                                                                                                                  | Risk score                            | 5                                    |
| <b>Chung<sup>22</sup></b>    | sICH                     | According to ECASS II  | Patients treated with IVT.                                            | 25/331 (7.6%)                                                                                                                                   | Machine learning                      | 5                                    |
| <b>GRASPS<sup>5</sup></b>    | sICH                     | According to NINDS     | Patients treated with IVT (0.9mg/kg) within 3 hours of symptom onset. | 496/10242 (4.8%) in total cohort.<br><br>In derivation cohort n=7171 (70% of total cohort, but number of patients with the outcome is unknown). | Risk score                            | 6                                    |
| <b>Guo<sup>23</sup></b>      | sICH                     | According to ECASS II  | Patients treated with IVT alone.                                      | 66/1200 (5.5%)                                                                                                                                  | Nomogram                              | 4                                    |
| <b>IER-SICH<sup>10</sup></b> | sICH                     | According to the HBC   | Development: Bridging of EVT with IVT within 6                        | 110/988 (11.1%)                                                                                                                                 | Regression model                      | 5                                    |



|                          |      |                        |                                                                                                                                        |                 |                  |   |
|--------------------------|------|------------------------|----------------------------------------------------------------------------------------------------------------------------------------|-----------------|------------------|---|
|                          |      |                        | hours of symptom onset.<br><br>Validation cohort: direct EVT within 6 hours of symptom onset.                                          |                 |                  |   |
| <b>IST-3<sup>6</sup></b> | sICH | According to ECASS III | Patients were treated with IVT (0.9mg/kg) within 6 hours of symptom onset (intervention group of IST-3).                               | 104/1515 (6.8%) | Regression model | 9 |
| <b>Lee<sup>30</sup></b>  | sICH | According to NINDS     | Patients within 12 hours of stroke onset with an ischemic lesion on diffusion-weighted MRI. Patients could be treated with IVT or EVT. | 53/958 (5.5%)   | Regression model | 6 |
| <b>Peng<sup>31</sup></b> | sICH | According to the HBC   | Patients treated with EVT within 6 hours of symptom onset.                                                                             | 37/334 (11.1%)  | Nomogram         | 3 |
| <b>Qian<sup>13</sup></b> | sICH | According to the HBC   | Patients treated with EVT.                                                                                                             | 21/127 (16.5%)  | Nomogram         | 7 |

|                                   |      |                        |                                                                                        |                                                                                                                                                                                                   |                                 |    |
|-----------------------------------|------|------------------------|----------------------------------------------------------------------------------------|---------------------------------------------------------------------------------------------------------------------------------------------------------------------------------------------------|---------------------------------|----|
| <b>RICH<sup>24</sup></b>          | sICH | According to ECASS III | Patients were treated with IVT within 4.5 hours of symptom onset.                      | 53/1336 (4.0%)                                                                                                                                                                                    | Regression model and risk score | 5  |
| <b>SEDAN<sup>7</sup></b>          | sICH | According to ECASS II  | Patients were treated with IVT (0.9mg/kg) within 4.5 hours of symptom onset.           | 68/974 (7.0%)                                                                                                                                                                                     | Risk score                      | 5  |
| <b>SICH<sup>25</sup></b>          | sICH | According to ECASS II  | Patients were treated with IVT.                                                        | 95/1172 (8.1%)                                                                                                                                                                                    | Risk score                      | 6  |
| <b>SITS-SICH<sup>8</sup></b>      | sICH | According to SITS-MOST | Patients were treated with IVT (SITS-ISTR) within as well as outside license criteria. | $N_{\text{derivation}}=15814$<br>$N_{\text{validation}}=15813$<br>$N_{\text{total}}=31627$<br>sICH <sub>SITS-MOST</sub> (1.8%)<br>sICH <sub>ECASS II</sub> (5.1%)<br>sICH <sub>NINDS</sub> (7.4%) | Risk score                      | 10 |
| <b>STARTING-SICH<sup>26</sup></b> | sICH | According to ECASS II  | Patients were treated with IVT (SITS-ISTR) within as well as outside license criteria. | sICH <sub>ECASS II</sub><br>440/12030 (3.7%)<br>sICH <sub>SITS-MOST</sub><br>207/12030 (1.7%)                                                                                                     | Nomogram                        | 10 |

|                                                   |      |                                         |                                                                               |                                                                                                     |                                                             |    |
|---------------------------------------------------|------|-----------------------------------------|-------------------------------------------------------------------------------|-----------------------------------------------------------------------------------------------------|-------------------------------------------------------------|----|
| <b>Sung<sup>27</sup> – Extension of SITS-SICH</b> | sICH | According to NINDS, ECASS II, SITS-MOST | Patients treated with IVT (0.7-0.9mg/kg) within 3 hours of symptom onset.     | sICH <sub>NINDS</sub> (7.3%)<br>sICH <sub>ECASS II</sub> (5.3%)<br>sICH <sub>SITS-MOST</sub> (3.5%) | Risk score: SITS-SICH with addition of OSCP classification. | 11 |
| <b>TAG<sup>11</sup></b>                           | sICH | According to ECASS III                  | Patients treated with EVT within 24 hours of symptom onset.                   | 19/578 (3.3%)                                                                                       | Risk score                                                  | 3  |
| <b>TURN<sup>28</sup></b>                          | sICH | According to NINDS                      | Patients treated with IVT (0.9mg/kg) within 3 hours of symptom onset.         | 12/210 (5.7%)                                                                                       | Regression model                                            | 2  |
| <b>Wang<sup>29</sup></b>                          | sICH | According to ECASS II                   | Patients treated with IVT.                                                    | 102/2237 (4.6%)                                                                                     | Machine learning                                            | 5  |
| <b>Constant Dit Beaufils<sup>44</sup></b>         | ICH  | NA                                      | Patients treated with EVT for an anterior circulation large vessel occlusion. | 653/1526 (42.8%)                                                                                    | Regression model                                            | 7  |
| <b>Cucchiara<sup>32</sup></b>                     | ICH  | NA                                      | Patients treated with IVT within 3 hours of symptom onset.                    | 158/1205 (12.1%)<br>Predicted probabilities for sICH used for calibration (72/1205; 6.0%)           | Risk score                                                  | 4  |

|                               |     |                       |                                                                                                                                                                                                                                       |                 |                  |   |
|-------------------------------|-----|-----------------------|---------------------------------------------------------------------------------------------------------------------------------------------------------------------------------------------------------------------------------------|-----------------|------------------|---|
| <b>El Nawar</b> <sup>33</sup> | HT  | According to ECASS II | Patients treated with IVT.                                                                                                                                                                                                            | 52/301 (17.3%)  | Regression model | 6 |
| <b>Feng</b> <sup>45</sup>     | ICH | NA                    | Patients treated with EVT.                                                                                                                                                                                                            | 34/90 (37.8%)   | Regression model | 3 |
| <b>HAT</b> <sup>34</sup>      | ICH | NA                    | Score based on ranking of cumulative ORs of the predictors from a PubMed literature search.<br><br>Predicted probabilities for calibration based on the combined validation cohorts (NINDS+local cohort of patients treated with EVT. |                 | Risk score       | 3 |
| <b>HTI</b> <sup>35</sup>      | ICH | NA                    | Patients with an ischemic stroke in the middle cerebral artery territory admitted within 12 hours of symptom onset.                                                                                                                   | 126/535 (23.6%) | Risk score       | 4 |
| <b>Genot-PA</b> <sup>36</sup> | ICH | NA                    | Patients treated with IVT within 4.5 hours of symptom onset.                                                                                                                                                                          | 189/885 (22.1%) | Regression model | 6 |
| <b>Kidwell</b> <sup>37</sup>  | ICH | NA                    | Patients treated with intra-arterial thrombolysis within 6 hours of symptom onset                                                                                                                                                     | 35/89 (39%)     | Regression model | 4 |

|                              |     |                       |                                                                                                                                                   |                  |                  |    |
|------------------------------|-----|-----------------------|---------------------------------------------------------------------------------------------------------------------------------------------------|------------------|------------------|----|
|                              |     |                       | for anterior circulation occlusions and within 24 hours of symptom onset for posterior circulation.                                               |                  |                  |    |
| <b>Krishnan<sup>38</sup></b> | ICH | NA                    | Patients with an ischemic stroke in the anterior circulation presenting within 4.5 hours of symptom onset.                                        | 106/273 (39%)    | Regression model | 3  |
| <b>Liu<sup>46</sup></b>      | HT  | NA                    | Patients within 24 hours of stroke onset. Patients could be treated with IVT or EVT.                                                              | 179/1207 (14.8%) | Regression model | 14 |
| <b>Nael<sup>47</sup></b>     | PH  | According to ECASS II | Randomized controlled trial evaluating EVT vs control within 8 hours in patients with an ischemic stroke in the anterior circulation (MR RESCUE). | 20/83 (24%)      | Regression model | 2  |

|                              |                     |                                                                                |                                                                              |                                                  |                  |    |
|------------------------------|---------------------|--------------------------------------------------------------------------------|------------------------------------------------------------------------------|--------------------------------------------------|------------------|----|
| <b>Puig<sup>39</sup></b>     | HT                  | According to ECASS II                                                          | Patients treated with IVT.                                                   | 37/156 (23.7%)                                   | Regression model | 3  |
| <b>SPAN-100<sup>40</sup></b> | ICH                 | NA                                                                             | Randomized controlled trial evaluating IVT vs control within 3 hours (NINDS) | 68/624 (10.9%)                                   | Risk score       | 2  |
| <b>Wu<sup>41</sup></b>       | HT                  | Any ICH according to ECASS II                                                  | Patients treated with IVT.                                                   | 16/131 (12.2%)                                   | Nomogram         | 10 |
| <b>Yeo<sup>42</sup></b>      | ICH                 | NA                                                                             | Patients treated with IVT.                                                   | Derivation ? n=376<br>Validation 175/922 (18.9%) | Nomogram         | 4  |
| <b>Yuan<sup>48</sup></b>     | HT                  | NA                                                                             | Patients treated with IVT and/or EVT within 24 hours of symptom onset.       | 17/76 (22.4%)                                    | Regression model | 2  |
| <b>Zhou<sup>43</sup></b>     | ICH                 | NA                                                                             | Patients treated with IVT within 24 hours of symptom onset.                  | 33/233 (14.2%)                                   | Nomogram         | 3  |
| <b>ASTRAL<sup>49</sup></b>   | Unfavorable outcome | Modified Rankin Score >2 at 3 months.<br>In external validation for sICH: sICH | Derivation: Patients admitted with an ischemic stroke within 24              | External validation cohort: 12/210 (5.71%)       | Risk score       | 6  |

|                             |                                            |                                                                    |                                                                                                                                                                                                                       |                                            |            |    |
|-----------------------------|--------------------------------------------|--------------------------------------------------------------------|-----------------------------------------------------------------------------------------------------------------------------------------------------------------------------------------------------------------------|--------------------------------------------|------------|----|
|                             |                                            | according to NINDS criteria.                                       | hours of symptom onset.<br><br>External validation:<br>Patients treated with IVT.                                                                                                                                     |                                            |            |    |
| <b>DRAGON</b> <sup>50</sup> | Functional outcome (modified Rankin Scale) | In external validation for sICH: sICH according to NINDS criteria. | Derivation:<br>Patients treated with IVT (0.9mg/kg).<br><br>External validation:<br>Patients treated with IVT.                                                                                                        | External validation cohort: 12/210 (5.71%) | Risk score | 7  |
| <b>iScore</b> <sup>51</sup> | Mortality                                  | In external validation: any ICH. <sup>51</sup>                     | Derivation:<br>Patients seen in the emergency department or admitted to hospital with an ischemic stroke.<br><br>External validation:<br>Randomized controlled trial evaluating IVT vs control within 3 hours (NINDS) | External validation cohort: 68/624 (10.9%) | Risk score | 12 |

|                                             |                                            |                                                                       |                                                                                                                                                                      |                                                                                                                                                                                               |                  |   |
|---------------------------------------------|--------------------------------------------|-----------------------------------------------------------------------|----------------------------------------------------------------------------------------------------------------------------------------------------------------------|-----------------------------------------------------------------------------------------------------------------------------------------------------------------------------------------------|------------------|---|
| <b>Stroke-TPI<sup>52</sup></b>              | Functional outcome (modified Rankin Scale) | In external validation for sICH: sICH according to NINDS criteria.    | Derivation:<br>Randomized controlled trials evaluating IVT vs control (NINDS, ATLANTIS A and B, ECASS II).<br><br>External validation:<br>Patients treated with IVT. | External validation cohort: 12/210 (5.71%)                                                                                                                                                    | Regression model | 3 |
| <b>THRIVE risk score</b>                    | Functional outcome and mortality           | In external validation: sICH according to NINDS, ECASS and SITS-MOST. | Derivation:<br>Patients treated with EVT.<br><br>External validation:<br>Patients treated with IVT.                                                                  | External validation cohort:<br>sICH <sub>NINDS</sub> 468/5970 (7.3%)<br>sICH <sub>ECASS</sub> 296/9146 (4.6%)<br>sICH <sub>SITS-MOST</sub> 107/6337 (1.7%)<br><br>No predicted probabilities. | Risk score       | 5 |
| <b>THRIVE regression model<sup>53</sup></b> | Good outcome (mRS 0-2 at 90 days)          | In external validation: sICH according to NINDS                       | Derivation:<br>Patients treated with and without                                                                                                                     | External validation cohort:<br>61/1128 (5.4%)                                                                                                                                                 | Regression model | 5 |



|  |  |  |                                                                                      |  |  |  |
|--|--|--|--------------------------------------------------------------------------------------|--|--|--|
|  |  |  | IVT (VISTA and SITS-MOST).<br><br>External validation:<br>Patients treated with IVT. |  |  |  |
|--|--|--|--------------------------------------------------------------------------------------|--|--|--|

ECASS II, indicates European Cooperative Acute Stroke Study II, sICH defined as neurological deterioration of NIHSS  $\geq 4$  and any hemorrhage on CT; ECASS III, European Cooperative Acute Stroke Study III, sICH defined as any hemorrhage with neurological deterioration, as indicated by an NIHSS score that was higher by  $\geq 4$  points than the value at baseline or the lowest value at baseline or the lowest value in the first 7 days, or any hemorrhage leading to death. In addition, the hemorrhage must have been identified as the predominant cause of the neurological deterioration; EVT, endovascular treatment; HBC, Heidelberg Bleeding Classification, sICH defined as any intracranial hemorrhage followed by a neurological deterioration that can be attributed to that hemorrhage, defined as an increase of  $\geq 4$  points on the NIHSS or  $\geq 2$  points on a specific NIHSS item; HT, hemorrhagic transformation; ICH, intracranial hemorrhage; NA, not applicable; NINDS, National Institute of Neurological Disorders and Stroke, sICH defined as any hemorrhage associated with neurological deterioration, not further defined; OCSP, Oxfordshire Community Stroke Project; PH, parenchymal hemorrhage; sICH, symptomatic ICH; SITS-MOST, Safe Implementation of Thrombolysis in Stroke-Monitoring Study, sICH defined as a local or remote Type 2 parenchymal hemorrhage on imaging 22 to 36 hours after treatment or earlier if the imaging scan was performed due to clinical deterioration combined with a neurological deterioration of  $\geq 4$  NIHSS points from baseline or from the lowest NIHSS score between baseline and 24 hours, or leading to death. A grading of Type 2 parenchymal hemorrhage for intracranial hemorrhage indicates a coagulum exceeding 30% of the infarct with substantial space occupation.

**Table S4.** Overview of models included in external validation with adapted predictors because variables were not available in the MR CLEAN Registry database.

| <b>Model</b>                                                                                     | <b>Variable that was not available in our dataset</b>                                         | <b>Adaptation</b>                                                                                                                                                                                                                                                            |
|--------------------------------------------------------------------------------------------------|-----------------------------------------------------------------------------------------------|------------------------------------------------------------------------------------------------------------------------------------------------------------------------------------------------------------------------------------------------------------------------------|
| GRASPS <sup>5</sup>                                                                              | Ethnicity (non-Asian vs. Asian)                                                               | This was imputed as 0 (non-Asian) for all patients.                                                                                                                                                                                                                          |
| HTI <sup>35</sup>                                                                                | Atrial fibrillation on electrocardiogram                                                      | This was replaced by history of atrial fibrillation.                                                                                                                                                                                                                         |
| IER-SICH <sup>10</sup>                                                                           | Careggi collateral score, range 0 to 4, with higher scores indicating better collateral flow. | In the MR CLEAN Registry, collaterals were scored by Tan, ranging from 0 to 3, with higher scores indicating a better collateral flow. Patients with a collateral score by Tan of 0, 1, 2, and 3 were assigned a Careggi collateral score of 0, 1, 2.5, and 4, respectively. |
| DRAGON, <sup>50</sup> SITS-SICH, <sup>8</sup> Lee, <sup>30</sup> and STARTING-SICH <sup>26</sup> | Time from symptom onset to treatment with intravenous thrombolysis.                           | For patients who had not received intravenous thrombolysis, onset to treatment with intravenous thrombolysis time was calculated as the onset to first CT time plus the median CT to intravenous thrombolysis time.                                                          |
| Constant Dit Beaufils <sup>44</sup>                                                              | Coronary artery disease                                                                       | This was replaced by history of myocardial infarction.                                                                                                                                                                                                                       |

**Table S5.** Calibration of investigated models to predict symptomatic intracranial hemorrhage.

|                                                           | <b>Calibration</b>                           |                                             |
|-----------------------------------------------------------|----------------------------------------------|---------------------------------------------|
|                                                           | Intercept (95% CI)                           | Slope (95% CI)                              |
| <b>Models developed to predict sICH</b>                   |                                              |                                             |
| <b>ASIAN</b> * <sup>9</sup>                               | -0.76 (-0.58 to -0.94)                       | 0.27 (0.12 to 0.43)                         |
| <b>GRASPS</b> <sup>5</sup>                                | NA                                           | NA                                          |
| <b>IER-SICH</b> * <sup>10</sup>                           | -0.28 (-0.11 to -0.45)                       | 0.32 (0.19 to 0.45)                         |
| <b>IST-3</b> <sup>6</sup>                                 | -0.15 (-0.01 to -0.31)                       | 0.80 (0.50 to 1.09)                         |
| <b>Lee</b> * <sup>30</sup>                                | -0.94 (-0.79 to -1.10)                       | 0.32 (0.10 to 0.53)                         |
| <b>Qian</b> * <sup>13</sup>                               | -1.24 (-1.08 to -1.42)                       | 0.21 (0.00 to 0.40)                         |
| <b>RICH</b> regression model/<br>risk score <sup>24</sup> | 0.05 (-0.12 to 0.20)/<br>0.32 (0.16 to 0.47) | 0.36 (0.20 to 0.51)/<br>0.53 (0.30 to 0.77) |
| <b>SEDAN</b> <sup>7</sup>                                 | -0.87 (-0.72 to -1.03)                       | 0.30 (0.10 to 0.51)                         |
| <b>SITS-SICH</b> <sup>8</sup>                             | 0.15 (-0.01 to 0.30)                         | 0.62 (0.38 to 0.87)                         |
| <b>STARTING-SICH</b> <sup>26</sup>                        | -0.03 (-0.19 to 0.12)                        | 0.56 (0.35 to 0.76)                         |
| <b>Sung</b> <sup>27</sup>                                 | NA                                           | NA                                          |
| <b>TAG</b> * <sup>11</sup>                                | 0.21 (-0.06 to -0.38)                        | 0.33 (0.04 to 0.60)                         |
| <b>TURN</b> <sup>28</sup>                                 | -0.13 (-0.30 to 0.02)                        | 0.27 (0.09 to 0.46)                         |
| <b>Models developed to predict ICH</b>                    |                                              |                                             |

|                                            |                        |                      |
|--------------------------------------------|------------------------|----------------------|
| <b>Cucchiara</b> <sup>32</sup>             | -0.16 (-0.00 to -0.32) | 0.33 (0.13 to 0.51)  |
| <b>HAT</b> <sup>34</sup>                   | -0.88 (-0.72 to -1.06) | 0.14 (0.00 to 0.27)  |
| <b>HTI</b> <sup>35</sup>                   | -2.03 (-1.85 to -2.22) | 0.14 (0.03 to 0.26)  |
| <b>Kidwell</b> <sup>37</sup>               | NA                     | NA                   |
| <b>Krishnan</b> <sup>38</sup>              | -2.53 (-2.39 to -2.70) | 0.29 (-0.12 to 0.67) |
| <b>SPAN-100</b> <sup>40</sup>              | NA                     | NA                   |
| <b>Yeo</b> <sup>42</sup>                   | -0.84 (-0.69 to -1.00) | 0.31 (0.06 to 0.55)  |
| <b>Constant di Beaufils*</b> <sup>44</sup> | NA                     | NA                   |
| <b>Zhou</b> <sup>43</sup>                  | -1.75 (-1.59 to -1.93) | 0.25 (0.11 to 0.40)  |

NA indicates not applicable, because calibration could not be assessed due to missing data in articles.

**Figure S1.** Calibration plots of IST-3 (A), SITS-SICH (B), and STARTING-SICH (C).

**A.**

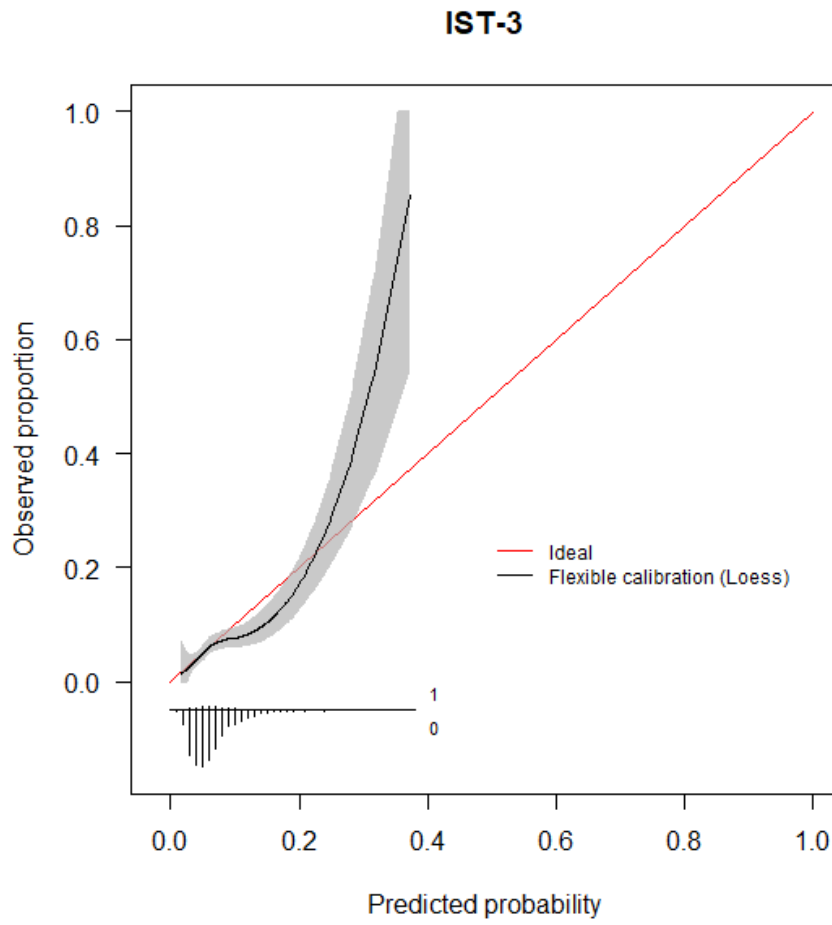

**B.**

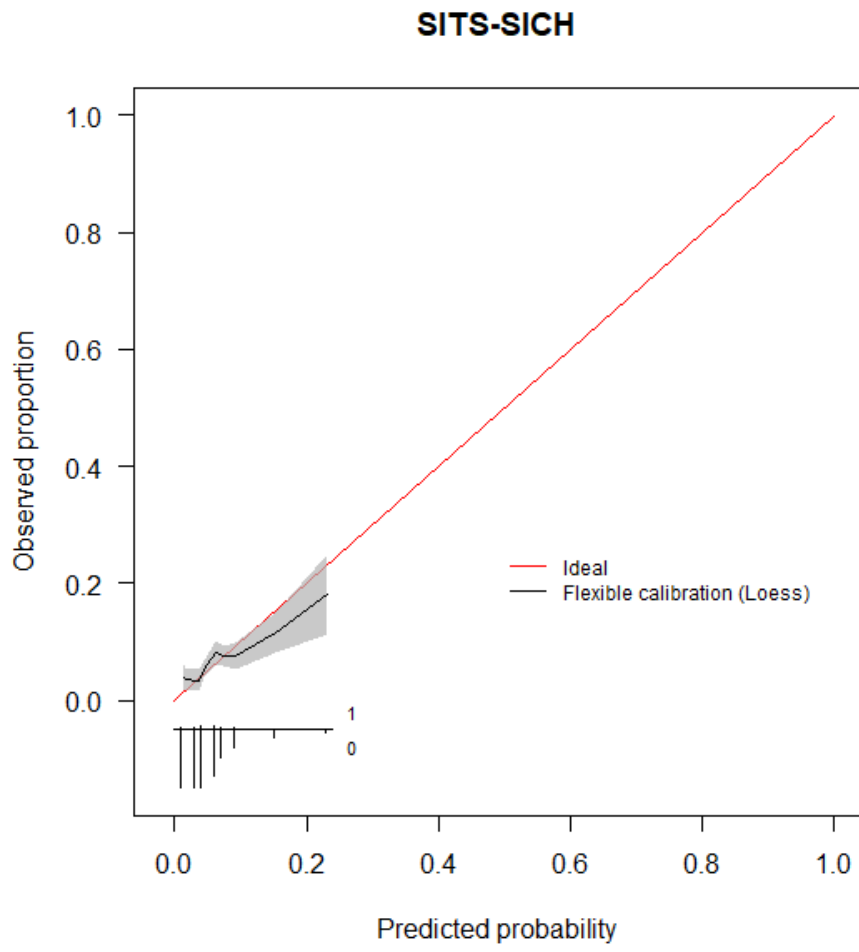

C.

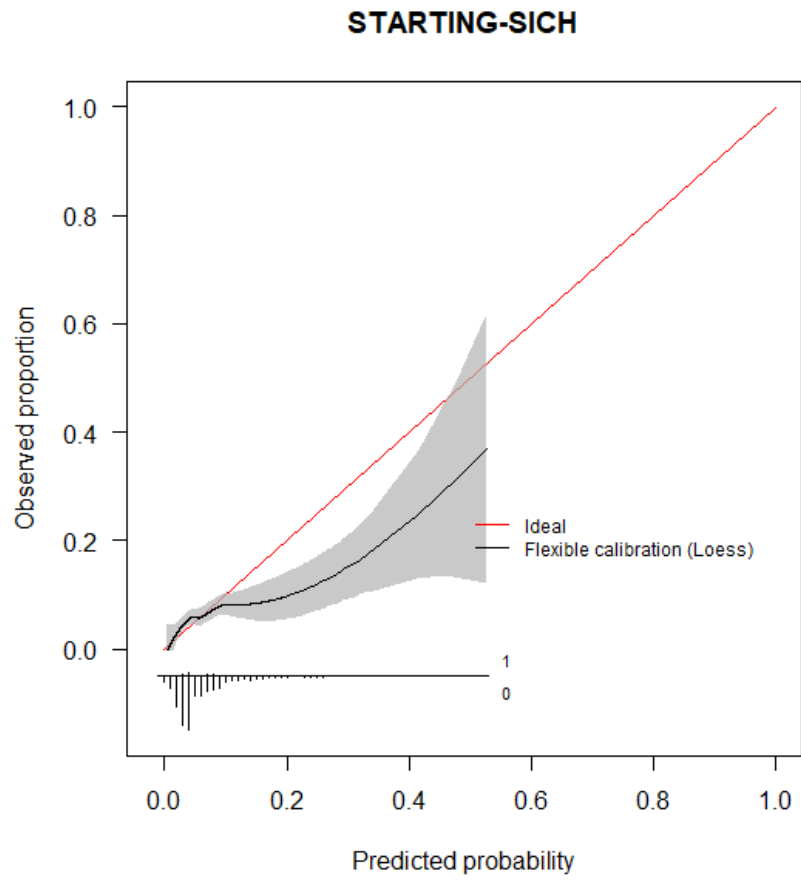

**Table S6.** MR CLEAN Registry Investigator list.



#### Executive committee

Diederik W.J. Dippel<sup>1</sup>; Aad van der Lugt<sup>2</sup>; Charles B.L.M. Majoie<sup>3</sup>; Yvo B.W.E.M. Roos<sup>4</sup>;  
Robert J. van Oostenbrugge<sup>5</sup>; Wim H. van Zwam<sup>6</sup>; Jelis Boiten<sup>14</sup>; Jan Albert Vos<sup>8</sup>

#### Study coordinators

Ivo G.H. Jansen<sup>3</sup>; Maxim J.H.L. Mulder<sup>1,2</sup>; Robert- Jan B. Goldhoorn<sup>5,6</sup>; Kars C.J. Compagne<sup>2</sup>;  
Manon Kappelhof<sup>3</sup>; Josje Brouwer<sup>4</sup>; Sanne J. den Hartog<sup>1,2,40</sup>; Wouter H. Hinsenveld<sup>5,6</sup>

#### Local principal investigators

Diederik W.J. Dippel<sup>1</sup>; Bob Roozenbeek<sup>1</sup>; Aad van der Lugt<sup>2</sup>; Adriaan C.G.M. van Es<sup>2</sup>; Charles  
B.L.M. Majoie<sup>3</sup>; Yvo B.W.E.M. Roos<sup>4</sup>; Bart J. Emmer<sup>3</sup>; Jonathan M. Coutinho<sup>4</sup>; Wouter J.  
Schonewille<sup>7</sup>; Jan Albert Vos<sup>8</sup>; Marieke J.H. Wermer<sup>9</sup>; Marianne A.A. van Walderveen<sup>10</sup>; Julie  
Staals<sup>5</sup>; Robert J. van Oostenbrugge<sup>5</sup>; Wim H. van Zwam<sup>6</sup>; Jeannette Hofmeijer<sup>11</sup>; Jasper M.  
Martens<sup>12</sup>; Geert J. Lycklama à Nijeholt<sup>13</sup>; Jelis Boiten<sup>14</sup>; Sebastiaan F. de Bruijn<sup>15</sup>; Lukas C.  
van Dijk<sup>16</sup>; H. Bart van der Worp<sup>17</sup>; Rob H. Lo<sup>18</sup>; Ewoud J. van Dijk<sup>19</sup>; Hieronymus D.  
Boogaarts<sup>20</sup>; J. de Vries<sup>22</sup>; Paul L.M. de Kort<sup>21</sup>; Julia van Tuijl<sup>21</sup>; Jo P. Peluso<sup>26</sup>; Puck Fransen<sup>22</sup>;  
Jan S.P. van den Berg<sup>22</sup>; Boudewijn A.A.M. van Hasselt<sup>23</sup>; Leo A.M. Aerden<sup>24</sup>; René J.  
Dallinga<sup>25</sup>; Maarten Uyttenboogaart<sup>28</sup>; Omid Eschgi<sup>29</sup>; Reinoud P.H. Bokkers<sup>29</sup>; Tobien  
H.C.M.L. Schreuder<sup>30</sup>; Roel J.J. Heijboer<sup>31</sup>; Koos Keizer<sup>32</sup>; Lonneke S.F. Yo<sup>33</sup>; Heleen M. den  
Hertog<sup>22</sup>; Tomas Bulut<sup>35</sup>; Paul J.A.M. Brouwers<sup>34</sup>

#### Imaging assessment committee

Charles B.L.M. Majoie<sup>3</sup>(chair); Wim H. van Zwam<sup>6</sup>; Aad van der Lugt<sup>2</sup>; Geert J. Lycklama à  
Nijeholt<sup>13</sup>; Marianne A.A. van Walderveen<sup>10</sup>; Marieke E.S. Sprengers<sup>3</sup>; Sjoerd F.M.  
Jenniskens<sup>27</sup>; René van den Berg<sup>3</sup>; Albert J. Yoo<sup>38</sup>; Ludo F.M. Beenen<sup>3</sup>; Alida A. Postma<sup>6</sup>;

Stefan D. Roosendaal<sup>3</sup>; Bas F.W. van der Kallen<sup>13</sup>; Ido R. van den Wijngaard<sup>13</sup>; Adriaan C.G.M. van Es<sup>2</sup>; Bart J. Emmer<sup>3</sup>; Jasper M. Martens<sup>12</sup>; Lonneke S.F. Yo<sup>33</sup>; Jan Albert Vos<sup>8</sup>; Joost Bot<sup>36</sup>; Pieter-Jan van Doormaal<sup>2</sup>; Anton Meijer<sup>27</sup>; Elyas Ghariq<sup>13</sup>; Reinoud P.H. Bokkers<sup>29</sup>; Marc P. van Proosdij<sup>37</sup>; G. Menno Krietemeijer<sup>33</sup>; Jo P. Peluso<sup>26</sup>; Hieronymus D. Boogaarts<sup>20</sup>; Rob Lo<sup>18</sup>; Dick Gerrits<sup>35</sup>; Wouter Dinkelaar<sup>2</sup>; Auke P.A. Appelman<sup>29</sup>; Bas Hammer<sup>16</sup>; Sjoert Pegge<sup>27</sup>; Anouk van der Hoorn<sup>29</sup>; Saman Vinke<sup>20</sup>.

#### Writing committee

Diederik W.J. Dippel<sup>1</sup>(chair); Aad van der Lugt<sup>2</sup>; Charles B.L.M. Majoie<sup>3</sup>; Yvo B.W.E.M. Roos<sup>4</sup>; Robert J. van Oostenbrugge<sup>5</sup>; Wim H. van Zwam<sup>6</sup>; Geert J. Lycklama à Nijeholt<sup>13</sup>; Jelis Boiten<sup>14</sup>; Jan Albert Vos<sup>8</sup>; Wouter J. Schonewille<sup>7</sup>; Jeannette Hofmeijer<sup>11</sup>; Jasper M. Martens<sup>12</sup>; H. Bart van der Worp<sup>17</sup>; Rob H. Lo<sup>18</sup>

#### Adverse event committee

Robert J. van Oostenbrugge<sup>5</sup>(chair); Jeannette Hofmeijer<sup>11</sup>; H. Zwenneke Flach<sup>23</sup>

#### Trial methodologist

Hester F. Lingsma<sup>40</sup>

#### Research nurses / local trial coordinators

Naziha el Ghannouti<sup>1</sup>; Martin Sterrenberg<sup>1</sup>; Wilma Pellikaan<sup>7</sup>; Rita Sprengers<sup>4</sup>; Marjan Elfrink<sup>11</sup>; Michelle Simons<sup>11</sup>; Marjolein Vossers<sup>12</sup>; Joke de Meris<sup>14</sup>; Tamara Vermeulen<sup>14</sup>; Annet Geerlings<sup>19</sup>; Gina van Vemde<sup>22</sup>; Tiny Simons<sup>30</sup>; Gert Messchendorp<sup>28</sup>; Nynke Nicolaij<sup>28</sup>; Hester Bongenaar<sup>32</sup>; Karin Bodde<sup>24</sup>; Sandra Kleijn<sup>34</sup>; Jasmijn Lodico<sup>34</sup>; Hanneke Droste<sup>34</sup>; Maureen Wollaert<sup>5</sup>; Sabrina Verheesen<sup>5</sup>; D. Jeurrisen<sup>5</sup>; Erna Bos<sup>9</sup>; Yvonne

Drabbe<sup>15</sup>; Michelle Sandiman<sup>15</sup>; Nicoline Aaldering<sup>11</sup>; Berber Zweedijk<sup>17</sup>; Jocova Vervoort<sup>21</sup>; Eva Ponjee<sup>22</sup>; Sharon Romviel<sup>19</sup>; Karin Kanselaar<sup>19</sup>; Denn Barning<sup>10</sup>.

PhD / Medical students:

Esmee Venema<sup>40</sup>; Vicky Chalos<sup>1,40</sup>; Ralph R. Geuskens<sup>3</sup>; Tim van Straaten<sup>19</sup>; Saliha Ergezen<sup>1</sup>; Roger R.M. Harmsma<sup>1</sup>; Daan Muijres<sup>1</sup>; Anouk de Jong<sup>1</sup>; Olvert A. Berkhemer<sup>1,3,6</sup>; Anna M.M. Boers<sup>3,39</sup>; J. Huguet<sup>3</sup>; P.F.C. Groot<sup>3</sup>; Marieke A. Mens<sup>3</sup>; Katinka R. van Kranendonk<sup>3</sup>; Kilian M. Treurniet<sup>3</sup>; Manon L. Tolhuisen<sup>3,39</sup>; Heitor Alves<sup>3</sup>; Annick J. Weterings<sup>3</sup>; Eleonora L.F. Kirkels<sup>3</sup>; Eva J.H.F. Voogd<sup>11</sup>; Lieve M. Schupp<sup>3</sup>; Sabine Collette<sup>28,29</sup>; Adrien E.D. Groot<sup>4</sup>; Natalie E. LeCouffe<sup>4</sup>; Praneeta R. Konduri<sup>39</sup>; Haryadi Prasetya<sup>39</sup>; Nerea Arrarte-Terreros<sup>39</sup>; Lucas A. Ramos<sup>39</sup>.

#### List of affiliations

*Department of Neurology<sup>1</sup>, Radiology<sup>2</sup>, Public Health<sup>40</sup>, Erasmus MC University Medical Center;*

*Department of Radiology<sup>3</sup>, Neurology<sup>4</sup>, Biomedical Engineering & Physics<sup>39</sup>, Amsterdam UMC, University of Amsterdam, Amsterdam;*

*Department of Neurology<sup>5</sup>, Radiology<sup>6</sup>, Maastricht University Medical Center and Cardiovascular Research Institute Maastricht (CARIM);*

*Department of Neurology<sup>7</sup>, Radiology<sup>8</sup>, Sint Antonius Hospital, Nieuwegein;*

*Department of Neurology<sup>9</sup>, Radiology<sup>10</sup>, Leiden University Medical Center;*

*Department of Neurology<sup>11</sup>, Radiology<sup>12</sup>, Rijnstate Hospital, Arnhem;*

*Department of Radiology<sup>13</sup>, Neurology<sup>14</sup>, Haaglanden MC, the Hague;*

*Department of Neurology<sup>15</sup>, Radiology<sup>16</sup>, HAGA Hospital, the Hague;*

*Department of Neurology<sup>17</sup>, Radiology<sup>18</sup>, University Medical Center Utrecht;*

*Department of Neurology<sup>19</sup>, Neurosurgery<sup>20</sup>, Radiology<sup>27</sup>, Radboud University Medical Center, Nijmegen;*

*Department of Neurology<sup>21</sup>, Radiology<sup>26</sup>, Elisabeth-TweeSteden ziekenhuis, Tilburg;*

*Department of Neurology<sup>22</sup>, Radiology<sup>23</sup>, Isala Klinieken, Zwolle;*

*Department of Neurology<sup>24</sup>, Radiology<sup>25</sup>, Reinier de Graaf Gasthuis, Delft;*

*Department of Neurology<sup>28</sup>, Radiology<sup>29</sup>, University Medical Center Groningen;*

*Department of Neurology<sup>30</sup>, Radiology<sup>31</sup>, Atrium Medical Center, Heerlen;*

*Department of Neurology<sup>32</sup>, Radiology<sup>33</sup>, Catharina Hospital, Eindhoven;*

*Department of Neurology<sup>34</sup>, Radiology<sup>35</sup>, Medical Spectrum Twente, Enschede;*

*Department of Radiology<sup>36</sup>, Amsterdam UMC, Vrije Universiteit van Amsterdam, Amsterdam;*

*Department of Radiology<sup>37</sup>, Noordwest Ziekenhuisgroep, Alkmaar;*

*Department of Radiology<sup>38</sup>, Texas Stroke Institute, Texas, United States of America.*
